# Supplementary material for: Zebras and Biting Flies: Quantitative Analysis of Reflected Light from Zebra Coats in Their Natural Habitat
Source: PubMed Central journal article supplement (PMC4880349; doi:10.1371/journal.pone.0154504), 2016-05-25
Supplement: pone.0154504.s001.pdf [file pone.0154504.s001.pdf]

| <b>zebra ID</b> | <b>sun azimuth</b> | <b>sun elevation</b> | <b>body angle</b> | <b>no. of regions</b> |
|-----------------|--------------------|----------------------|-------------------|-----------------------|
| 1               | 70                 | 9                    | 180               | 6                     |
| 2               | 313                | 53                   | 225               | 3                     |
| 3               | 300                | 37                   | 180               | 7                     |
| 4               | 299                | 38                   | 180               | 8                     |
| 5               | 314                | 54                   | 0                 | 6                     |
| 6               | 355                | 64                   | 0                 | 7                     |
| 8               | 70                 | 14                   | 0                 | 5                     |
| 9               | 43                 | 56                   | 180               | 7                     |
| 10              | 73                 | 2                    | 0                 | 6                     |
| 11              | 62                 | 13                   | 0                 | 6                     |
| 12              | 317                | 59                   | 180               | 7                     |
| 13              | 292                | 27                   | 45                | 7                     |
| 14              | 74                 | 3                    | 180               | 7                     |
| 15              | 56                 | 50                   | 315               | 6                     |
| 16              | 355                | 68                   | 45                | 8                     |
| 17              | 349                | 67                   | 180               | 8                     |
| 18              | 297                | 41                   | 45                | 8                     |
| 19              | 289                | 19                   | 0                 | 7                     |
| 20              | 31                 | 65                   | 180               | 8                     |
| 21              | 285                | 25                   | 180               | 7                     |
| 22              | 78                 | 30                   | 0                 | 6                     |

Table S1. Summary statistics of the images that were analyzed for this paper. Sun azimuth is relative to true north, and elevation is relative to the horizon, as usual. Body angle was estimated by eye, and is relative to the viewing direction, with 0 degrees indicating a perpendicular view with nose right and 180 degrees perpendicular with nose left.
