# Supplementary material for: Zebras and Biting Flies: Quantitative Analysis of Reflected Light from Zebra Coats in Their Natural Habitat
Source: PubMed Central journal article supplement (PMC4880349; doi:10.1371/journal.pone.0154504), 2016-05-25
Supplement: pone.0154504.s002.pdf [file pone.0154504.s002.pdf]

| <b>Source</b> | <b>Sum Sq.</b> | <b>d.f.</b> | <b>Mean Sq.</b> | <b>F</b> | <b>Prob&gt;F</b> |
|---------------|----------------|-------------|-----------------|----------|------------------|
| stripe        | 0.1661         | 1           | 0.1661          | 18.06    | 0.0003           |
| zebra         | 1.17921        | 20          | 0.05896         | 6.61     | 0                |
| stripe*zebra  | 0.17842        | 20          | 0.00892         | 0.59     | 0.9183           |
| Error         | 3.60269        | 238         | 0.01514         |          |                  |
| Total         | 5.13465        | 279         |                 |          |                  |

Table S2. Anova relating *d* value to stripe identity and zebra, which was treated as a random factor.
